# Supplementary material for: Smac mimetic-induced upregulation of interferon-β sensitizes glioblastoma to temozolomide-induced cell death
Source: Cell Death Dis. 2015 Sep 17;6(9):e1888–. doi: 10.1038/cddis.2015.235 (PMC4650438; doi:10.1038/cddis.2015.235)
Supplement: Supplementary Figures [file cddis2015235x1.pdf]

Suppl. Fig. 1

A

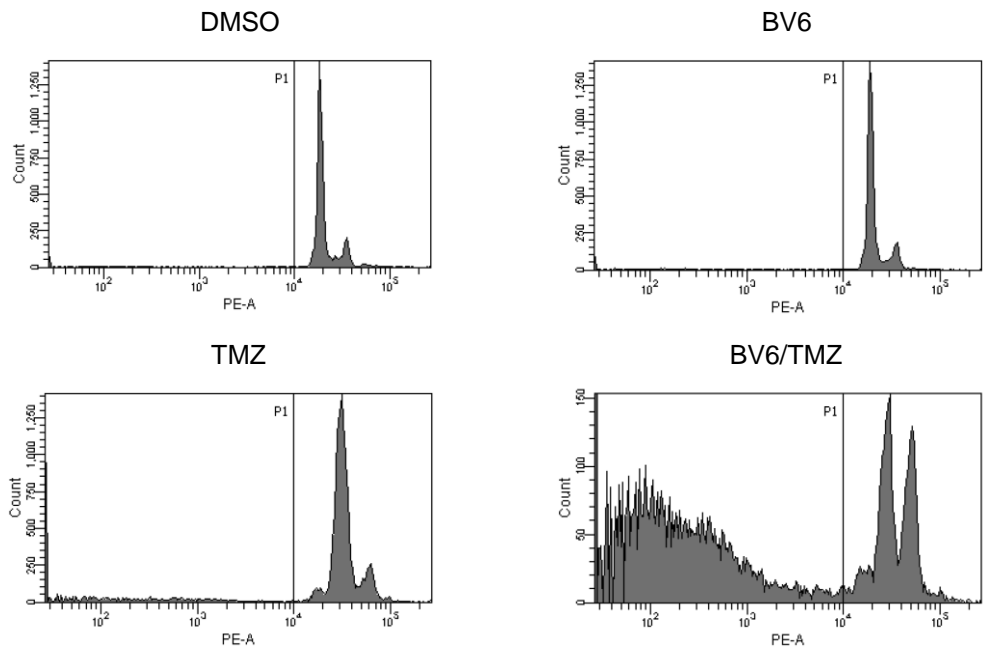

B

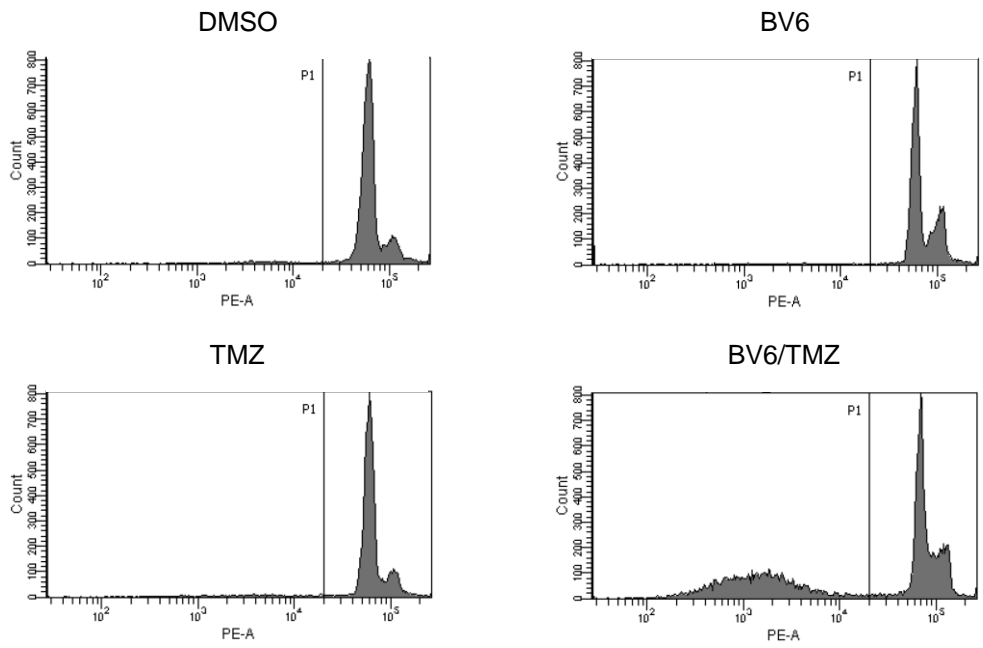

# Suppl. Fig. 2

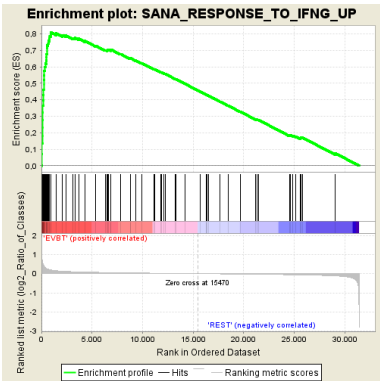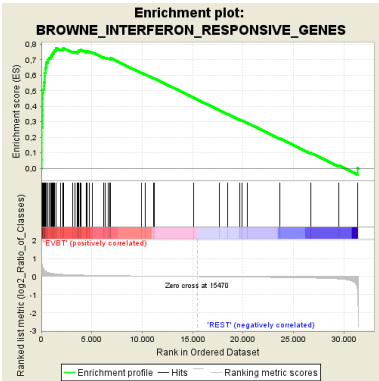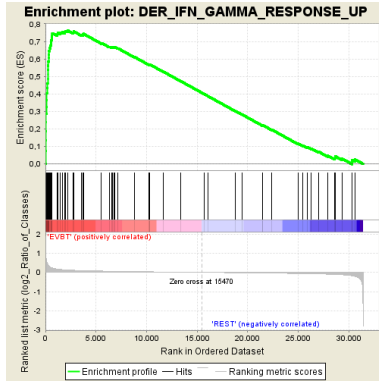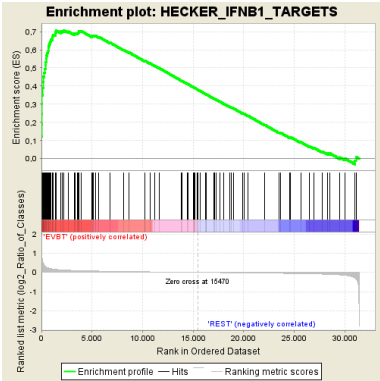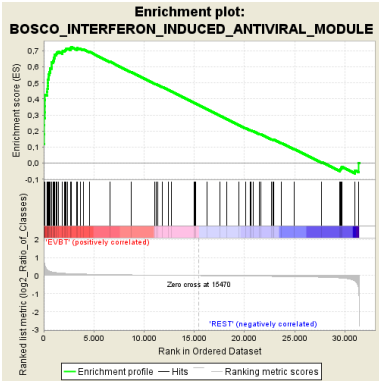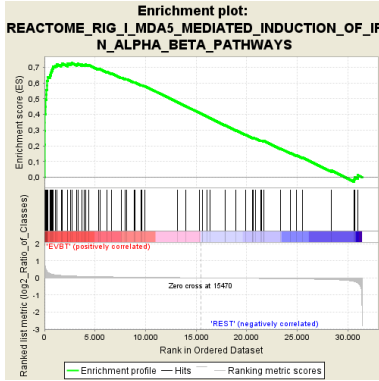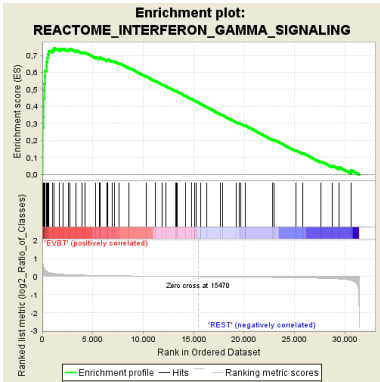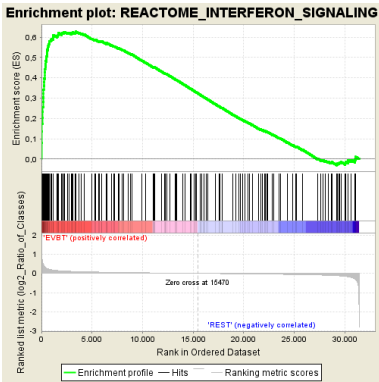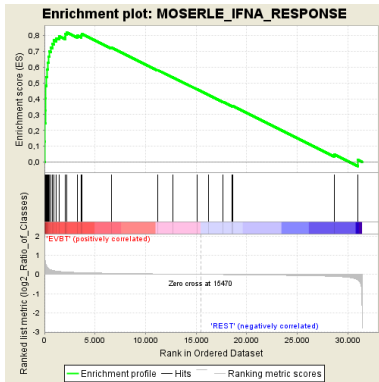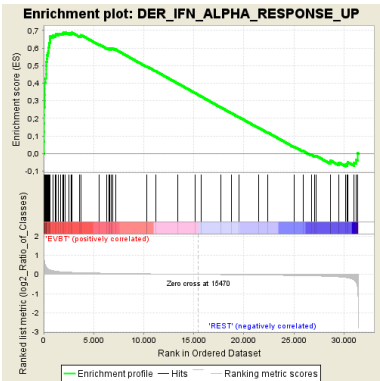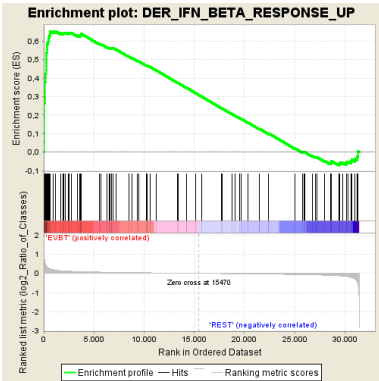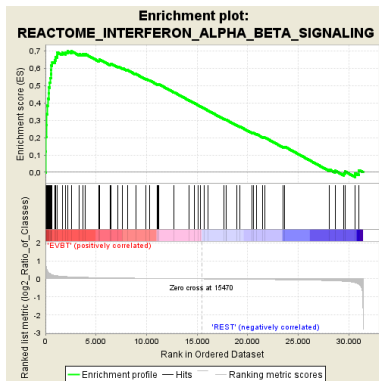

Suppl. Fig. 3

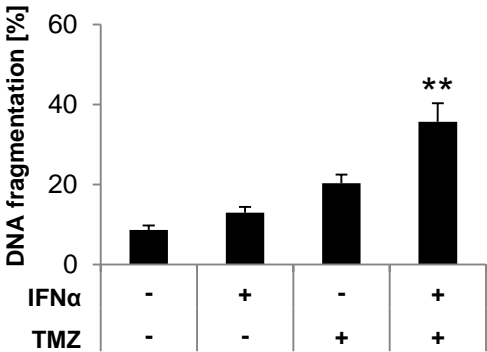

Suppl. Fig. 4

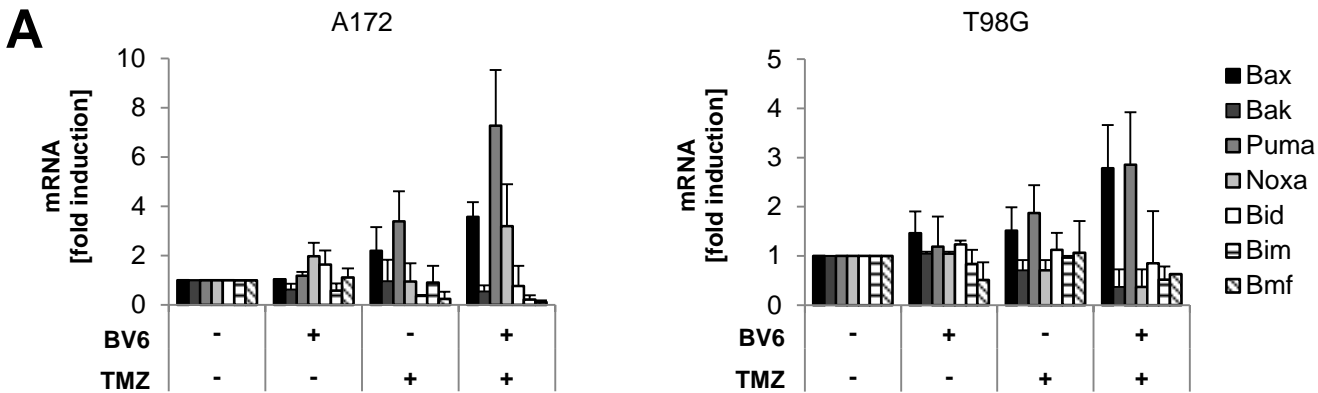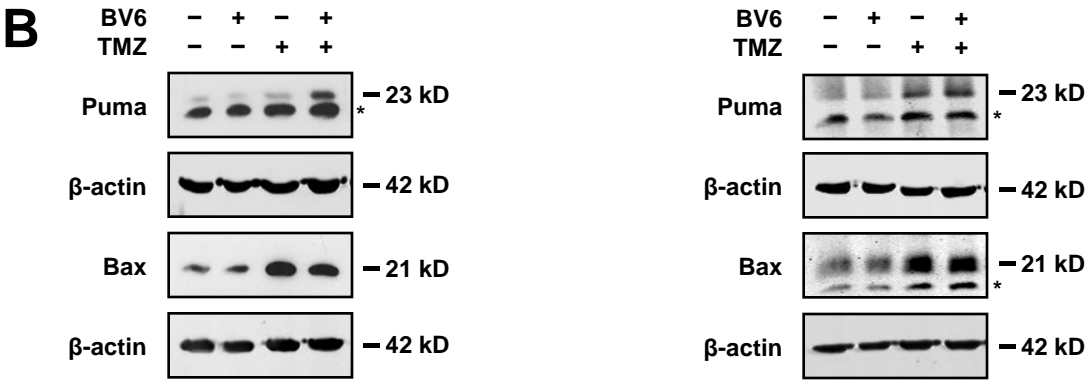

Suppl. Fig. 5

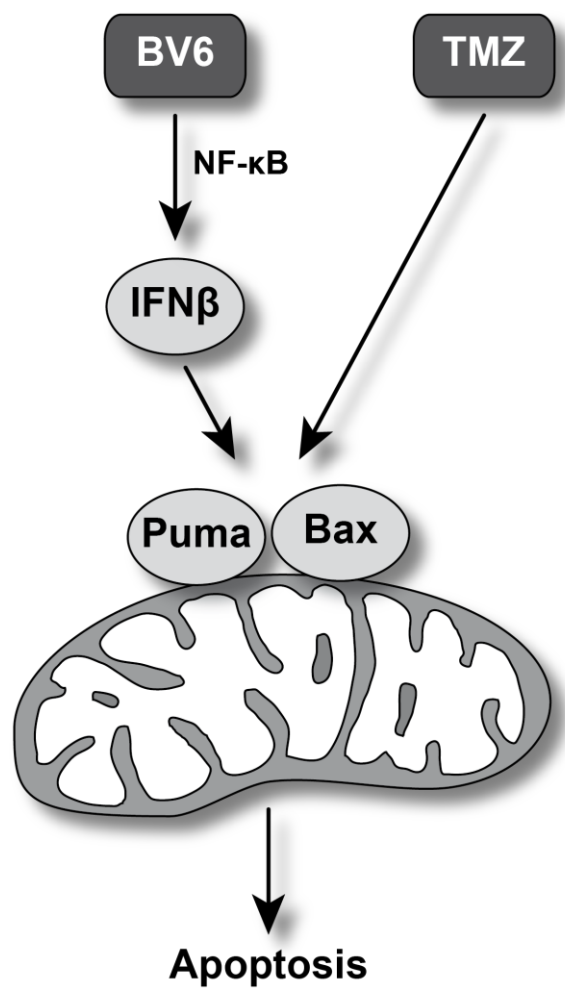

## **Supplementary figure legends**

### **Suppl. Figure 1: BV6 enhances TMZ-induced apoptosis**

A172 cells (a) or T98G cells (b) were treated for 144 hours with 100  $\mu$ M TMZ and/or 2  $\mu$ M BV6 (A172) or 4  $\mu$ M BV6 (T98G) or DMSO. Apoptosis was determined by FACS analysis of DNA fragmentation of PI-stained nuclei. Representative graphs of three independent experiments performed in triplicate are shown.

### **Suppl. Figure 2: BV6/TMZ co-treatment upregulates IFN-responsive genes**

A172 cells stably expressing I $\kappa$ B $\alpha$ -SR or EV were treated for 9 hours with 100  $\mu$ M TMZ and/or 2  $\mu$ M BV6 or DMSO. Whole-Genome expression profiling of three independent experiments was performed. Genes with similar regulation in A172 cells expressing I $\kappa$ B $\alpha$ -SR served as control for background expression of non-NF- $\kappa$ B-stimulated genes. GSEA was performed comparing TMZ/BV6-treated cells to all other settings. Enrichment plots of IFN signaling-mediated gene sets out of the top 100 regulated gene sets upon BV6/TMZ-treatment are shown.

### **Suppl. Figure 3: IFN $\alpha$ sensitizes glioblastoma cells to TMZ-induced apoptosis**

A172 cells were treated for 120 hours with 100  $\mu$ M TMZ and/or 1 ng/ml IFN $\alpha$  or DMSO. Apoptosis was determined by FACS analysis of DNA fragmentation of PI-stained nuclei. Mean values + SD of three independent experiments performed in triplicate are shown; \*p<0.05; \*\*p<0.01.

### **Suppl. Figure 4: BV6/TMZ-mediated upregulation of Puma and Bax**

(a) A172 cells (left) or T98G cells (right) were treated for 48 hours with 100  $\mu$ M TMZ and/or 2  $\mu$ M BV6 (A172) or 4  $\mu$ M BV6 (T98G) or DMSO. Bax, Bak, Puma, Noxa, Bid, Bim and Bmf mRNA levels were analyzed by qRT-PCR, normalized to 28S rRNA

expression and fold increase in mRNA levels are shown. Mean values + SD of two independent experiments performed in duplicate are shown.

(b) A172 cells (left) or T98G cells (right) were treated for 48 hours with 100  $\mu$ M TMZ and/or 2  $\mu$ M BV6 (A172) or 4  $\mu$ M BV6 (T98G) or DMSO. Expression levels of Bax and Puma were analyzed by western blotting, asterisks indicate unspecific bands. Expression of  $\beta$ -actin served as loading control. A representative experiment of two independent experiments is shown.

**Suppl. Figure 5: BV6-mediated upregulation of IFN $\beta$  sensitizes glioblastoma cells to TMZ-induced mitochondrial apoptosis**

Smac mimetic BV6-induced NF- $\kappa$ B-activation promoted transcriptional upregulation of IFN $\beta$ . IFN $\beta$  and TMZ cooperated to induce apoptosis in glioblastoma cells. Cooperative upregulation of the proapoptotic Bcl-2 family proteins Puma and Bax via BV6/TMZ treatment contributed to BV6/TMZ-induced apoptosis.
